# Supplementary material for: The specificity of UVA-induced DNA damage in human melanocytes
Source: Royal Society of Chemistry journal article supplement (doi:10.1039/c1pp05185g), 2011-10-10
Supplement: c1pp05185g.pdf [file c1pp05185g.pdf]

## The specificity of UVA-induced DNA damage in human melanocytes

Stéphane Mouret, Anne Forestier and Thierry Douki

### Supplementary information

5 **Figure S1: emission spectra of the UVB and UVA lamps**

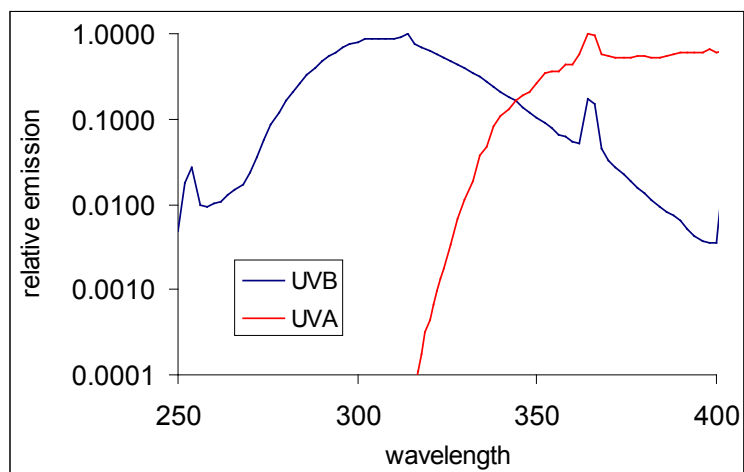

**Table S1: Comparison of the expression of modulated DNA repair genes between melanocytes and keratinocytes for three donors.**

|                                       | Donor 1     | Donor 2     | Donor 3     |
|---------------------------------------|-------------|-------------|-------------|
| <b>Base Excision Repair</b>           |             |             |             |
| OGG1                                  | 1.87 ± 0.45 | 0.92 ± 0.24 | 0.81 ± 0.16 |
| APE1                                  | 3.29 ± 0.80 | 0.87 ± 0.09 | 1.57 ± 0.31 |
| MYH                                   | 2.85 ± 0.69 | 0.94 ± 0.09 | 1.99 ± 0.40 |
| UNG                                   | 5.27 ± 1.28 | 1.13 ± 0.11 | 1.85 ± 0.37 |
| NTHL1                                 | 2.39 ± 0.58 | 0.91 ± 0.09 | 1.23 ± 0.25 |
| APTX                                  | 0.51 ± 0.26 | 0.62 ± 0.30 | 0.79 ± 0.13 |
| PARP1                                 | 1.17 ± 0.59 | 1.58 ± 0.78 | 3.09 ± 0.53 |
| XRCC1                                 | 2.56 ± 1.30 | 1.62 ± 0.81 | 1.12 ± 0.19 |
| LigI                                  | 0.63 ± 0.15 | 1.13 ± 0.11 | 1.91 ± 0.38 |
| Lig III                               | 1.63 ± 0.83 | 1.12 ± 0.55 | 1.53 ± 0.26 |
| polB                                  | 1.96 ± 0.71 | 1.01 ± 0.25 | 1.31 ± 0.43 |
| <b>Nucleotide Excision Repair</b>     |             |             |             |
| XPA                                   | 2.94 ± 1.49 | 1.53 ± 0.75 | 1.91 ± 0.33 |
| XPC                                   | 1.24 ± 0.63 | 0.74 ± 0.36 | 0.79 ± 0.13 |
| XPD                                   | 2.30 ± 0.56 | 0.83 ± 0.08 | 1.22 ± 0.24 |
| XPB                                   | 2.19 ± 0.53 | 0.80 ± 0.08 | 1.31 ± 0.26 |
| DDB1                                  | 3.34 ± 1.69 | 1.82 ± 0.90 | 3.25 ± 0.55 |
| DDB2                                  | 0.69 ± 0.35 | 1.01 ± 0.50 | 1.54 ± 0.26 |
| CSA                                   | 1.43 ± 0.72 | 1.11 ± 0.55 | 0.89 ± 0.15 |
| CSB                                   | 0.58 ± 0.30 | 0.49 ± 0.24 | 0.40 ± 0.07 |
| ERCC1                                 | 0.56 ± 0.28 | 0.44 ± 0.22 | 0.39 ± 0.07 |
| polD                                  | 0.59 ± 0.21 | 0.74 ± 0.19 | 1.49 ± 0.48 |
| polE                                  | 0.34 ± 0.13 | 1.15 ± 0.29 | 1.47 ± 0.48 |
| PCNA                                  | 1.73 ± 0.88 | 2.06 ± 0.82 | 2.17 ± 0.37 |
| <b>Double Strand Breaks Repair</b>    |             |             |             |
| Ku 70                                 | 0.76 ± 0.28 | 0.76 ± 0.19 | 1.38 ± 0.45 |
| Ku 80                                 | 0.90 ± 0.33 | 0.81 ± 0.20 | 1.29 ± 0.42 |
| DNA-PKcs                              | 1.49 ± 0.36 | 0.81 ± 0.08 | 1.78 ± 0.36 |
| MRE11                                 | 1.30 ± 0.32 | 1.14 ± 0.34 | 1.25 ± 0.25 |
| rad 50                                | 1.44 ± 0.52 | 0.95 ± 0.24 | 1.09 ± 0.36 |
| nbs 1                                 | 1.23 ± 0.45 | 1.20 ± 0.30 | 0.91 ± 0.30 |
| XRCC4                                 | 1.41 ± 0.34 | 1.12 ± 0.33 | 0.79 ± 0.16 |
| Lig IV                                | 1.55 ± 0.38 | 1.89 ± 146  | 0.90 ± 0.18 |
| polM                                  | 2.29 ± 0.83 | 1.64 ± 0.41 | 1.85 ± 0.60 |
| <b>Alkylation and Mismatch Repair</b> |             |             |             |
| MGMT                                  | 2.46 ± 0.90 | 1.00 ± 0.25 | 0.81 ± 0.27 |
| mlh 1                                 | 0.92 ± 0.34 | 0.99 ± 0.25 | 1.30 ± 0.42 |
| msh 3                                 | 1.31 ± 0.48 | 1.12 ± 0.28 | 0.71 ± 0.23 |
| msh 6                                 | 0.64 ± 0.23 | 0.67 ± 0.17 | 0.58 ± 0.19 |

Values represent the mean variation for the four reference genes. Error bars are standard deviations.  
 Values larger than 1 correspond to genes more expressed in melanocytes while ratios below 1 correspond to genes more expressed in keratinocytes.
